# Supplementary material
Source: PubMed Central journal article supplement (PMC2840457)
Supplement: 0908071107_pnas.200908071SI.pdf [file 0908071107_pnas.200908071SI.pdf]

# Supporting Information

Hou et al. 10.1073/pnas.0908071107

## Other Supporting Information

[SI Text \(doc\)](#)
